# Supplementary material for: Synthesis and structure of cycloperfluoroalkylated derivatives of C70, C70(C2F4) and C70(C4F8)n, n = 1–6
Source: Royal Society of Chemistry journal article supplement (doi:10.1039/b9nj00444k), 2010-01-01
Supplement: b9nj00444k.pdf [file b9nj00444k.pdf]

## Supporting information for

### Synthesis and structure of cycloperfluoroalkylated derivatives of $C_{70}$ , $C_{70}(C_2F_4)$ and $C_{70}(C_4F_8)_n$ , $n = 1 - 6$

Natalia I. Gruzinskaya, Andrey I. Silin, Anna S. Pimenova, Pavel A. Khavrel, Vitaliy Yu. Markov, Lev N. Sidorov, Erhard Kemnitz and Sergey I. Troyanov

Table S1. Schlegel diagrams, relative energies and IUPAC abbreviation for the most stable isomers of  $C_{70}(C_2F_4)$  within the gap of  $170 \text{ kJ mol}^{-1}$ .

| Stability order | Schlegel diagram                                                                    | $\Delta\Delta_f H_0^0$ , $\text{kJ mol}^{-1}$ | IUPAC abbreviation   |
|-----------------|-------------------------------------------------------------------------------------|-----------------------------------------------|----------------------|
| 1               | 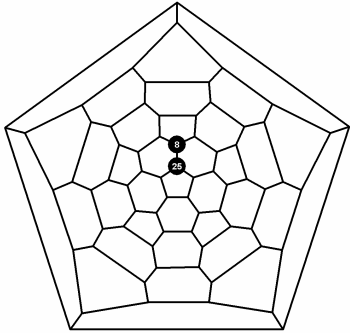   | 0.0                                           | 8,25- $C_{70}C_2F_4$ |
| 2               |  | 14.3                                          | 7,22- $C_{70}C_2F_4$ |
| 3               |  | 40.6                                          | 1,6- $C_{70}C_2F_4$  |

|   |                                                                                     |      |                                                     |
|---|-------------------------------------------------------------------------------------|------|-----------------------------------------------------|
| 4 | 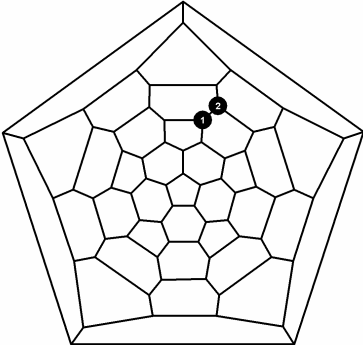   | 58.5 | 1,2-C <sub>70</sub> C <sub>2</sub> F <sub>4</sub>   |
| 5 |    | 69.6 | 24,25-C <sub>70</sub> C <sub>2</sub> F <sub>4</sub> |
| 6 |   | 72.3 | 7,8-C <sub>70</sub> C <sub>2</sub> F <sub>4</sub>   |
| 7 |  | 80.7 | 1,9-C <sub>70</sub> C <sub>2</sub> F <sub>4</sub>   |

|   |                                                                                   |       |                                                    |
|---|-----------------------------------------------------------------------------------|-------|----------------------------------------------------|
| 8 | 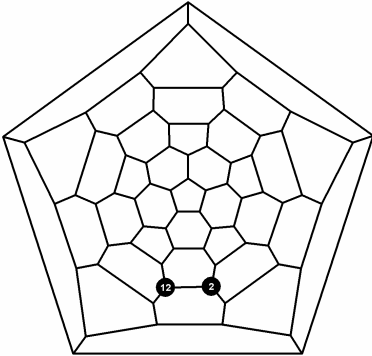 | 94.5  | 2,12-C <sub>70</sub> C <sub>2</sub> F <sub>4</sub> |
| 9 |  | 167.9 | 1,4-C <sub>70</sub> C <sub>2</sub> F <sub>4</sub>  |

Table S2. Schlegel diagrams, relative energies and IUPAC abbreviation for the most stable isomers of C<sub>70</sub>(C<sub>4</sub>F<sub>8</sub>) within the gap of 120 kJ mol<sup>-1</sup>.

| Stability order | Schlegel diagram                                                                    | $\Delta\Delta_f H_0^0$ ,<br>kJ mol <sup>-1</sup> | IUPAC abbreviation                                 | Conformation |
|-----------------|-------------------------------------------------------------------------------------|--------------------------------------------------|----------------------------------------------------|--------------|
| 1               | 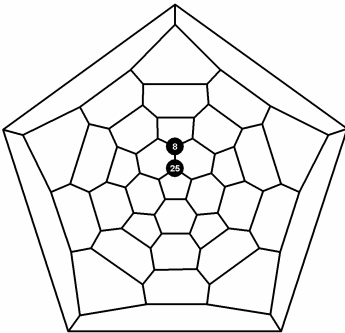 | 0.0                                              | 8,25-C <sub>70</sub> C <sub>4</sub> F <sub>8</sub> | boat         |
| 2               |  | 13.7                                             | 7,22-C <sub>70</sub> C <sub>4</sub> F <sub>8</sub> | boat         |

|   |                                                                                     |      |                                                     |         |
|---|-------------------------------------------------------------------------------------|------|-----------------------------------------------------|---------|
| 3 | 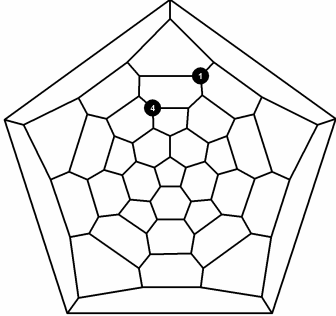   | 24.9 | 1,4-C <sub>70</sub> C <sub>4</sub> F <sub>8</sub>   | chair   |
| 4 |    | 33.7 | 1,6-C <sub>70</sub> C <sub>4</sub> F <sub>8</sub>   | boat    |
| 5 |   | 56.5 | 24,25-C <sub>70</sub> C <sub>4</sub> F <sub>8</sub> | boat    |
| 6 |  | 58.7 | 7,8-C <sub>70</sub> C <sub>4</sub> F <sub>8</sub>   | boat    |
| 7 |  | 58.7 | 7,24-C <sub>70</sub> C <sub>4</sub> F <sub>8</sub>  | chair_2 |

|    |                                                                                     |       |                                                    |         |
|----|-------------------------------------------------------------------------------------|-------|----------------------------------------------------|---------|
| 8  | 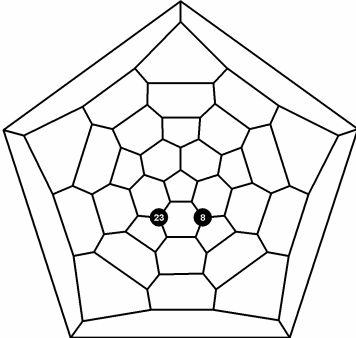   | 64.3  | 8,23-C <sub>70</sub> C <sub>4</sub> F <sub>8</sub> | chair   |
| 9  |    | 69.2  | 1,2-C <sub>70</sub> C <sub>4</sub> F <sub>8</sub>  | boat    |
| 10 |   | 69.6  | 1,9-C <sub>70</sub> C <sub>4</sub> F <sub>8</sub>  | boat    |
| 11 |  | 85.0  | 1,11-C <sub>70</sub> C <sub>4</sub> F <sub>8</sub> | chair   |
| 12 |  | 103.9 | 2,10-C <sub>70</sub> C <sub>4</sub> F <sub>8</sub> | chair_2 |

|    |                                                                                   |       |                                                   |                    |
|----|-----------------------------------------------------------------------------------|-------|---------------------------------------------------|--------------------|
| 13 | 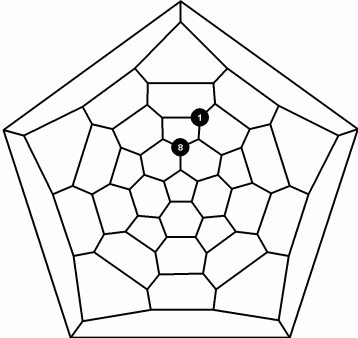 | 111.0 | 1,8-C <sub>70</sub> C <sub>4</sub> F <sub>8</sub> | chair <sub>1</sub> |
| 14 |  | 111.6 | 7,9-C <sub>70</sub> C <sub>4</sub> F <sub>8</sub> | chair              |
